# Supplementary material for: Promising Treatment for Type 2 Diabetes: Fecal Microbiota Transplantation Reverses Insulin Resistance and Impaired Islets
Source: PubMed Central journal article supplement (PMC6979041; doi:10.3389/fcimb.2019.00455), 2020-01-17
Supplement: Data_Sheet_1.pdf [file Data_Sheet_1.pdf]

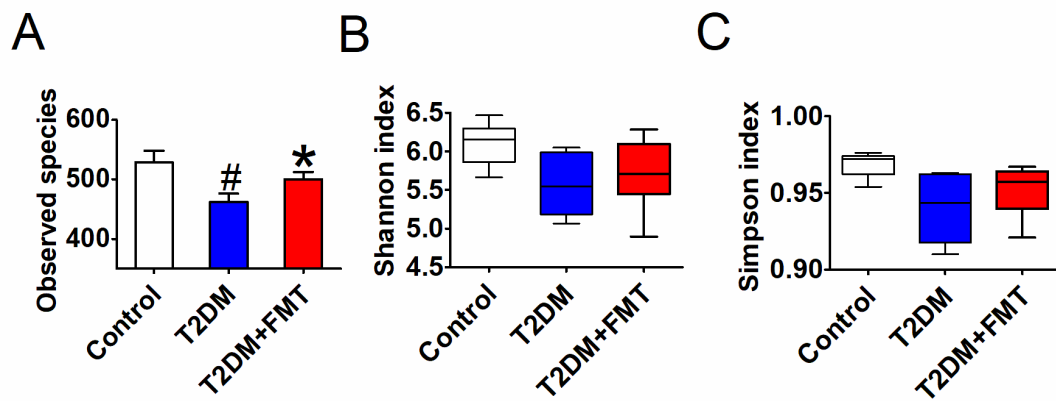

**Fig.S1.** The effect of FMT on gut microbiota in T2DM mice. (A) Observed species. (B) Box plot of Shannon index. (C) Box plot of Simpson index. \*P < 0.05 versus T2DM, #P < 0.05 versus Control, n = 5.

**Table S1 Multiplicative quick score of IL-6 in islets**

| <i>Quick score=A x B</i> |                                                |
|--------------------------|------------------------------------------------|
|                          | 0 1 2 3 4 5 6 7 8 9 10 11 12 13 14 15 16 17 18 |
| <b>Control</b>           | 10 4 3 0 1 0 0 0 0 0 0 0 0 0 0 0 0 0 0         |
| <b>T2DM</b>              | 0 3 2 0 4 0 3 0 0 5 0 0 1 0 0 0 0 0 0          |
| <b>T2DM+FMT</b>          | 9 3 0 0 4 0 2 0 0 0 0 0 0 0 0 0 0 0 0          |

Notes: A = the percentage of positive cells. B=the average of intensity.

**Table S2 Multiplicative quicks core of IL-10 in islets**

| <i>Quick score=A x B</i> |                                                |
|--------------------------|------------------------------------------------|
|                          | 0 1 2 3 4 5 6 7 8 9 10 11 12 13 14 15 16 17 18 |
| <b>Control</b>           | 0 1 1 1 0 0 3 0 0 4 0 0 5 0 0 3 0 0 0          |
| <b>T2DM</b>              | 7 5 3 2 0 0 0 0 0 1 0 0 0 0 0 0 0 0 0          |
| <b>T2DM+FMT</b>          | 1 1 3 1 0 0 2 0 0 8 0 0 2 0 0 0 0 0 0          |

Notes: A = the percentage of positive cells. B=the average of intensity.

**Table 3 Multiplicative quick score of TNF- $\alpha$  in islets**

---

*Quick score=A x B*

---

|                 | 0  | 1 | 2 | 3 | 4 | 5 | 6 | 7 | 8 | 9 | 10 | 11 | 12 | 13 | 14 | 15 | 16 | 17 | 18 |
|-----------------|----|---|---|---|---|---|---|---|---|---|----|----|----|----|----|----|----|----|----|
| <b>Control</b>  | 12 | 4 | 1 | 0 | 1 | 0 | 0 | 0 | 0 | 0 | 0  | 0  | 0  | 0  | 0  | 0  | 0  | 0  | 0  |
| <b>T2DM</b>     | 1  | 1 | 3 | 0 | 4 | 0 | 4 | 0 | 0 | 5 | 0  | 0  | 0  | 0  | 0  | 0  | 0  | 0  | 0  |
| <b>T2DM+FMT</b> | 6  | 5 | 3 | 0 | 2 | 0 | 1 | 0 | 0 | 1 | 0  | 0  | 0  | 0  | 0  | 0  | 0  | 0  | 0  |

---

Notes: A = the percentage of positive cells. B=the average of intensity.
